# Supplementary material for: Improved Cladocopium goreaui Genome Assembly Reveals Features of a Facultative Coral Symbiont and the Complex Evolutionary History of Dinoflagellate Genes
Source: MDPI journal article supplement (doi:10.3390/microorganisms10081662), 2022-08-17
Supplement: s1 [file s1]

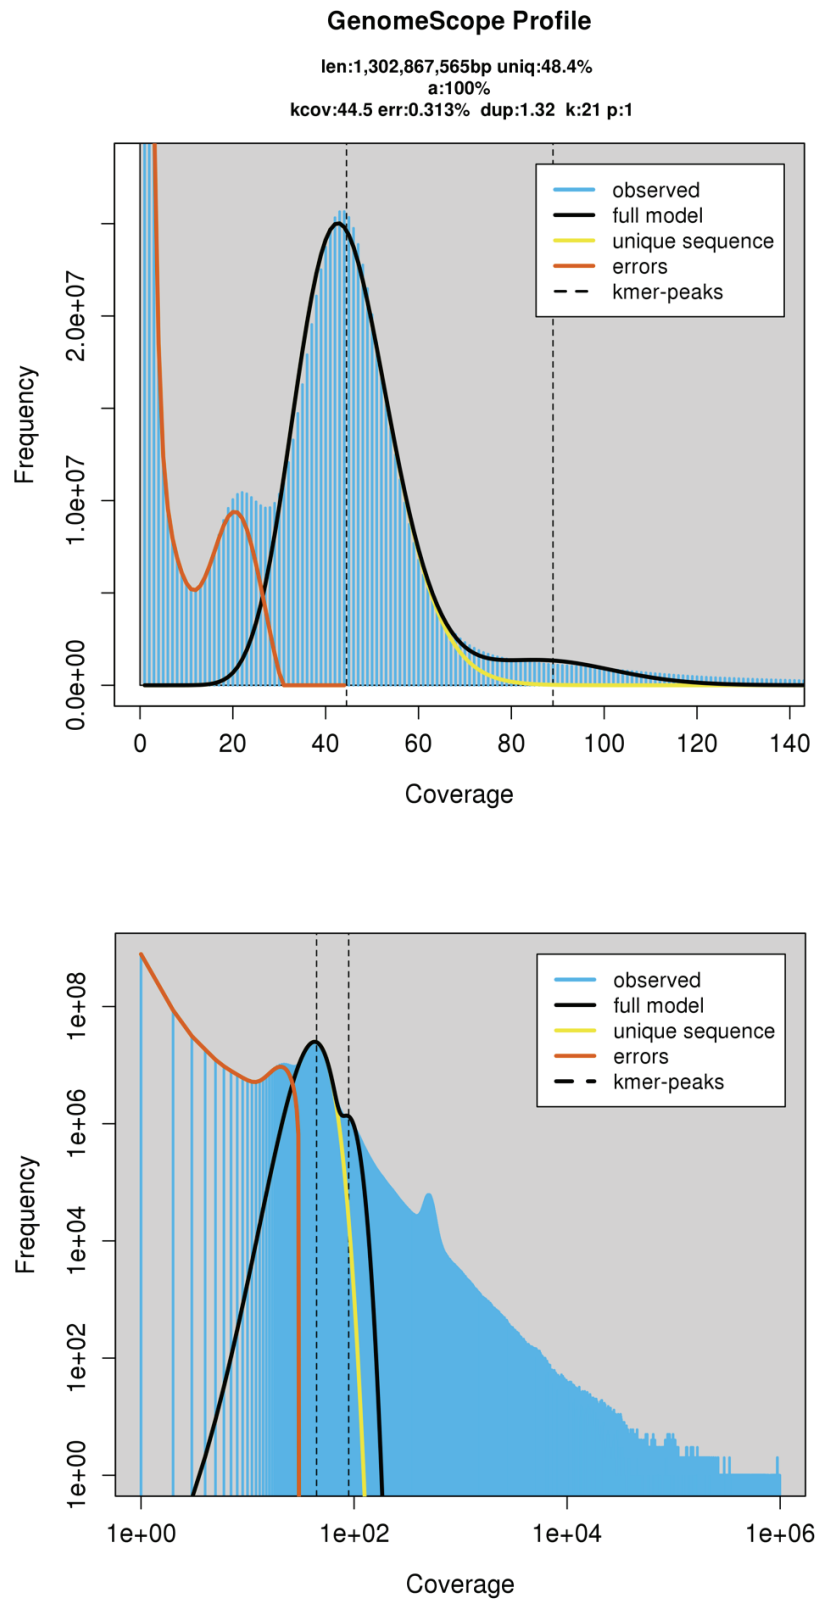

**Figure S1.** Genome size estimation for *Cladocypium goreau* using GenomeScope v2.0, based on frequency distribution of k-mers from short-read sequence data, shown for exact (top) and log-transformed (below) values.

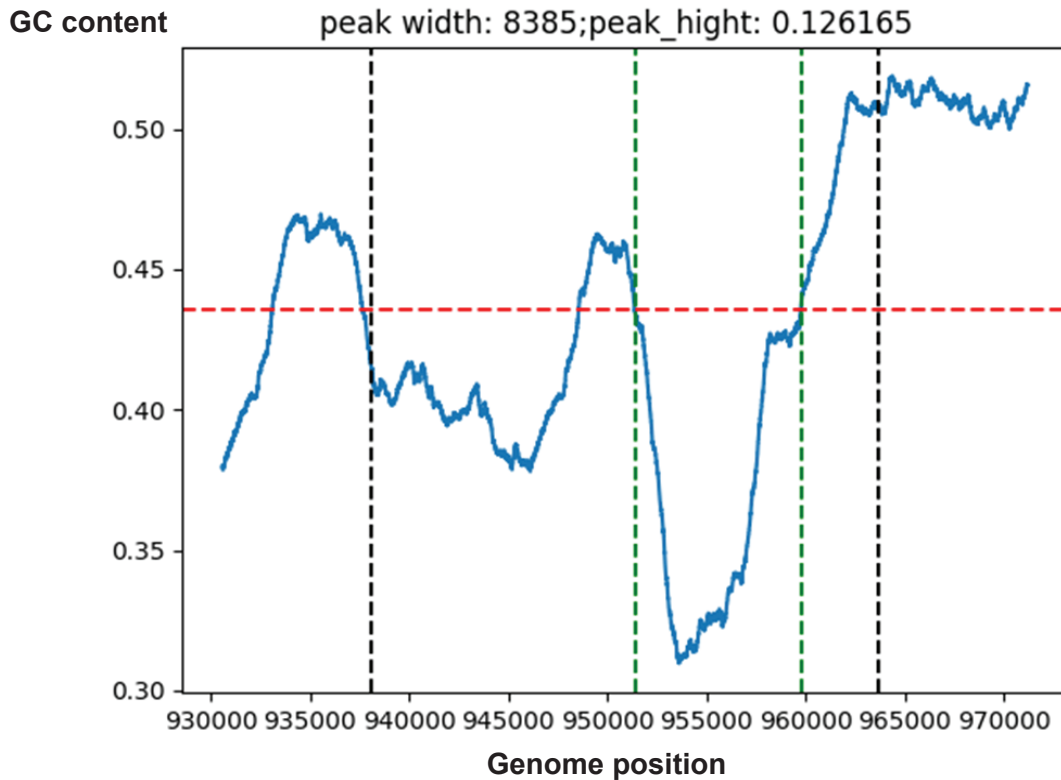

**Figure S2.** An example of G+C dip observed in the *C. goreau* genome of a putative boundary of topologically associated domain (TAD), shown for 4000-bp sliding windows on scaffold scf7180000355754. The x-axis shows the centre position of each sliding window along the scaffold. Of the dashed lines, the red line indicates the mean %G+C of the scaffold (as background), the green lines signify the G+C dip region, and the black lines signify a putative TAD boundary.

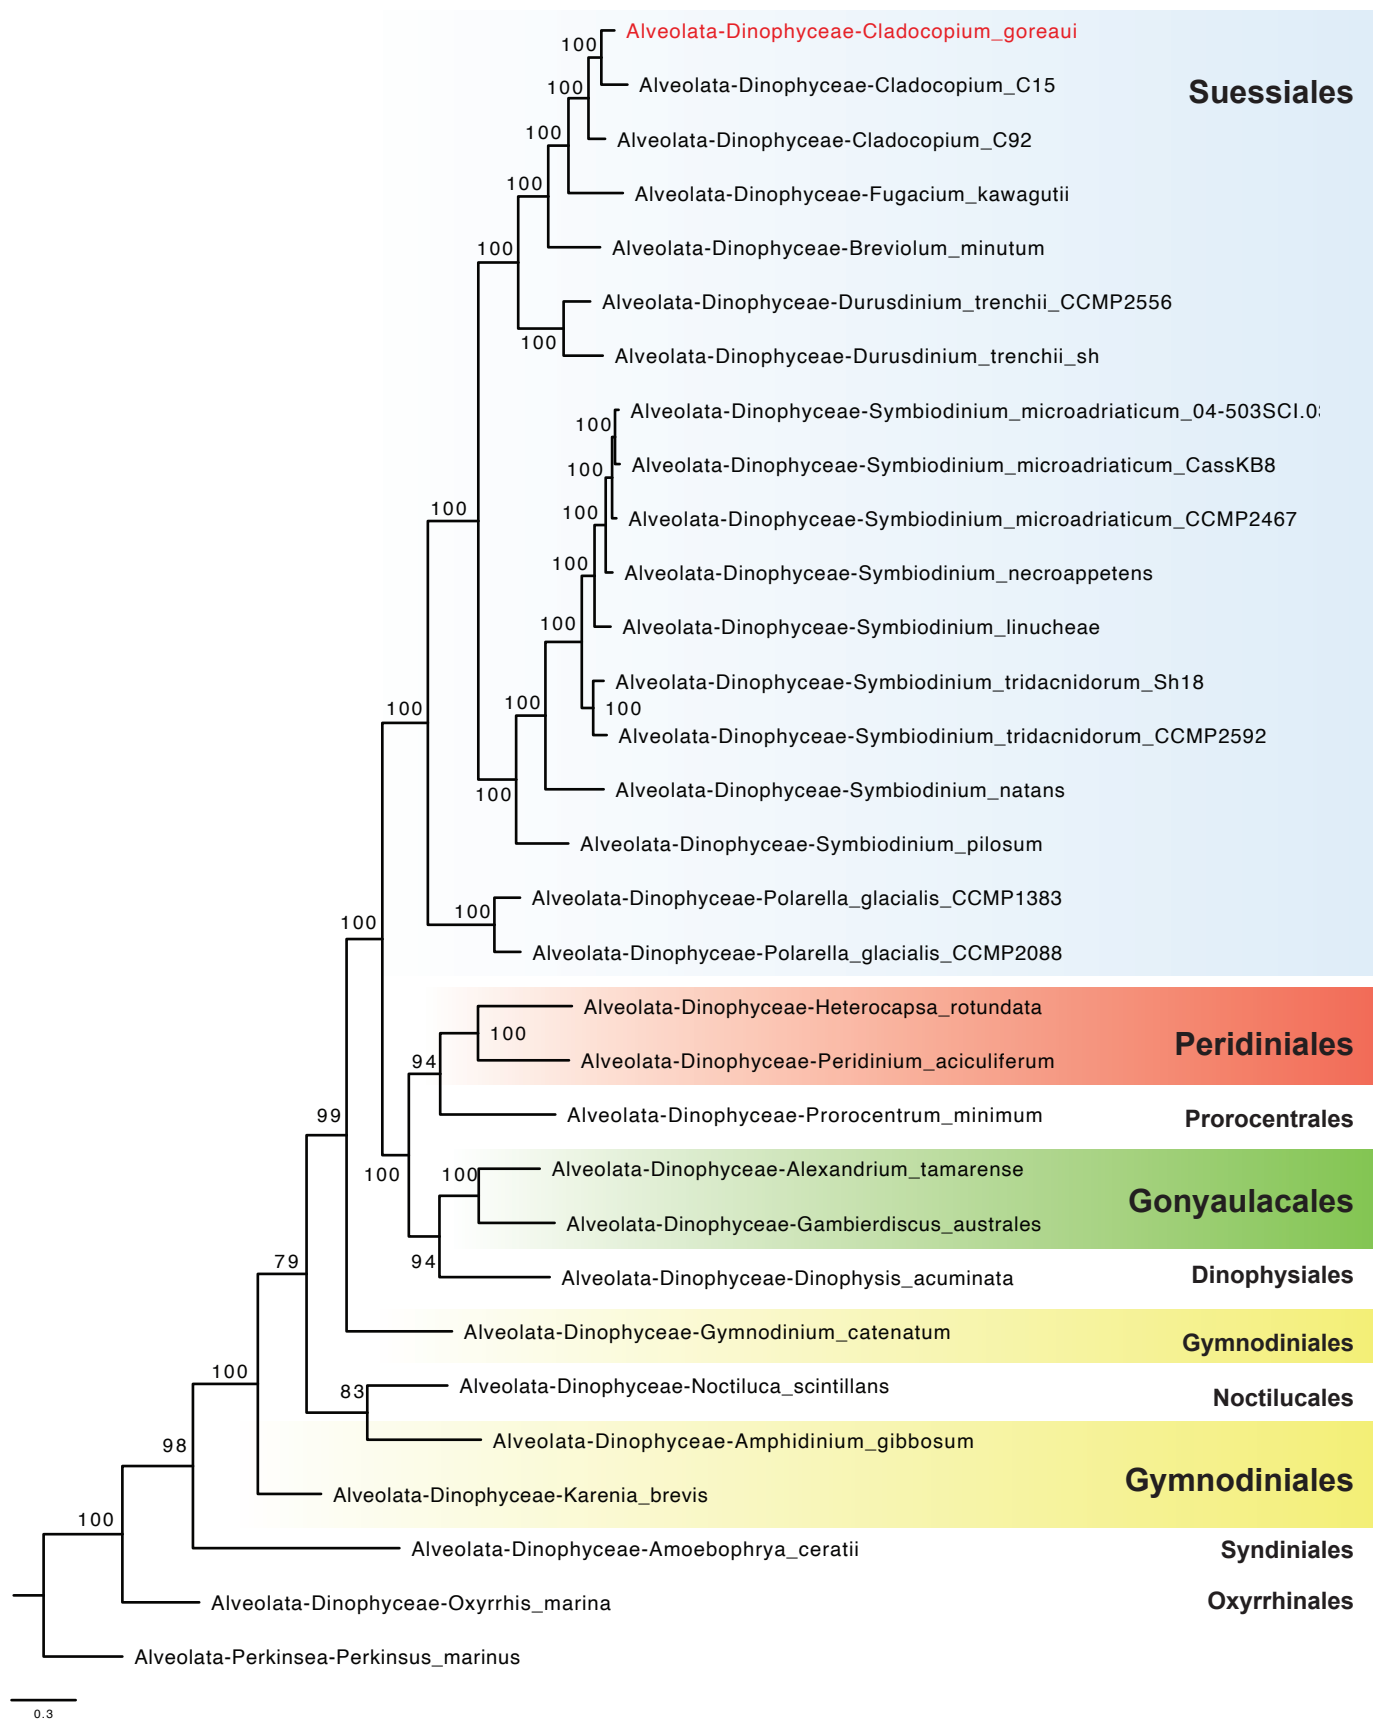

**Figure S3.** Species tree of 30 dinoflagellate taxa and *Perkinsus* as outgroup, inferred from 3,411 strictly orthologous (single-copy) protein sets.

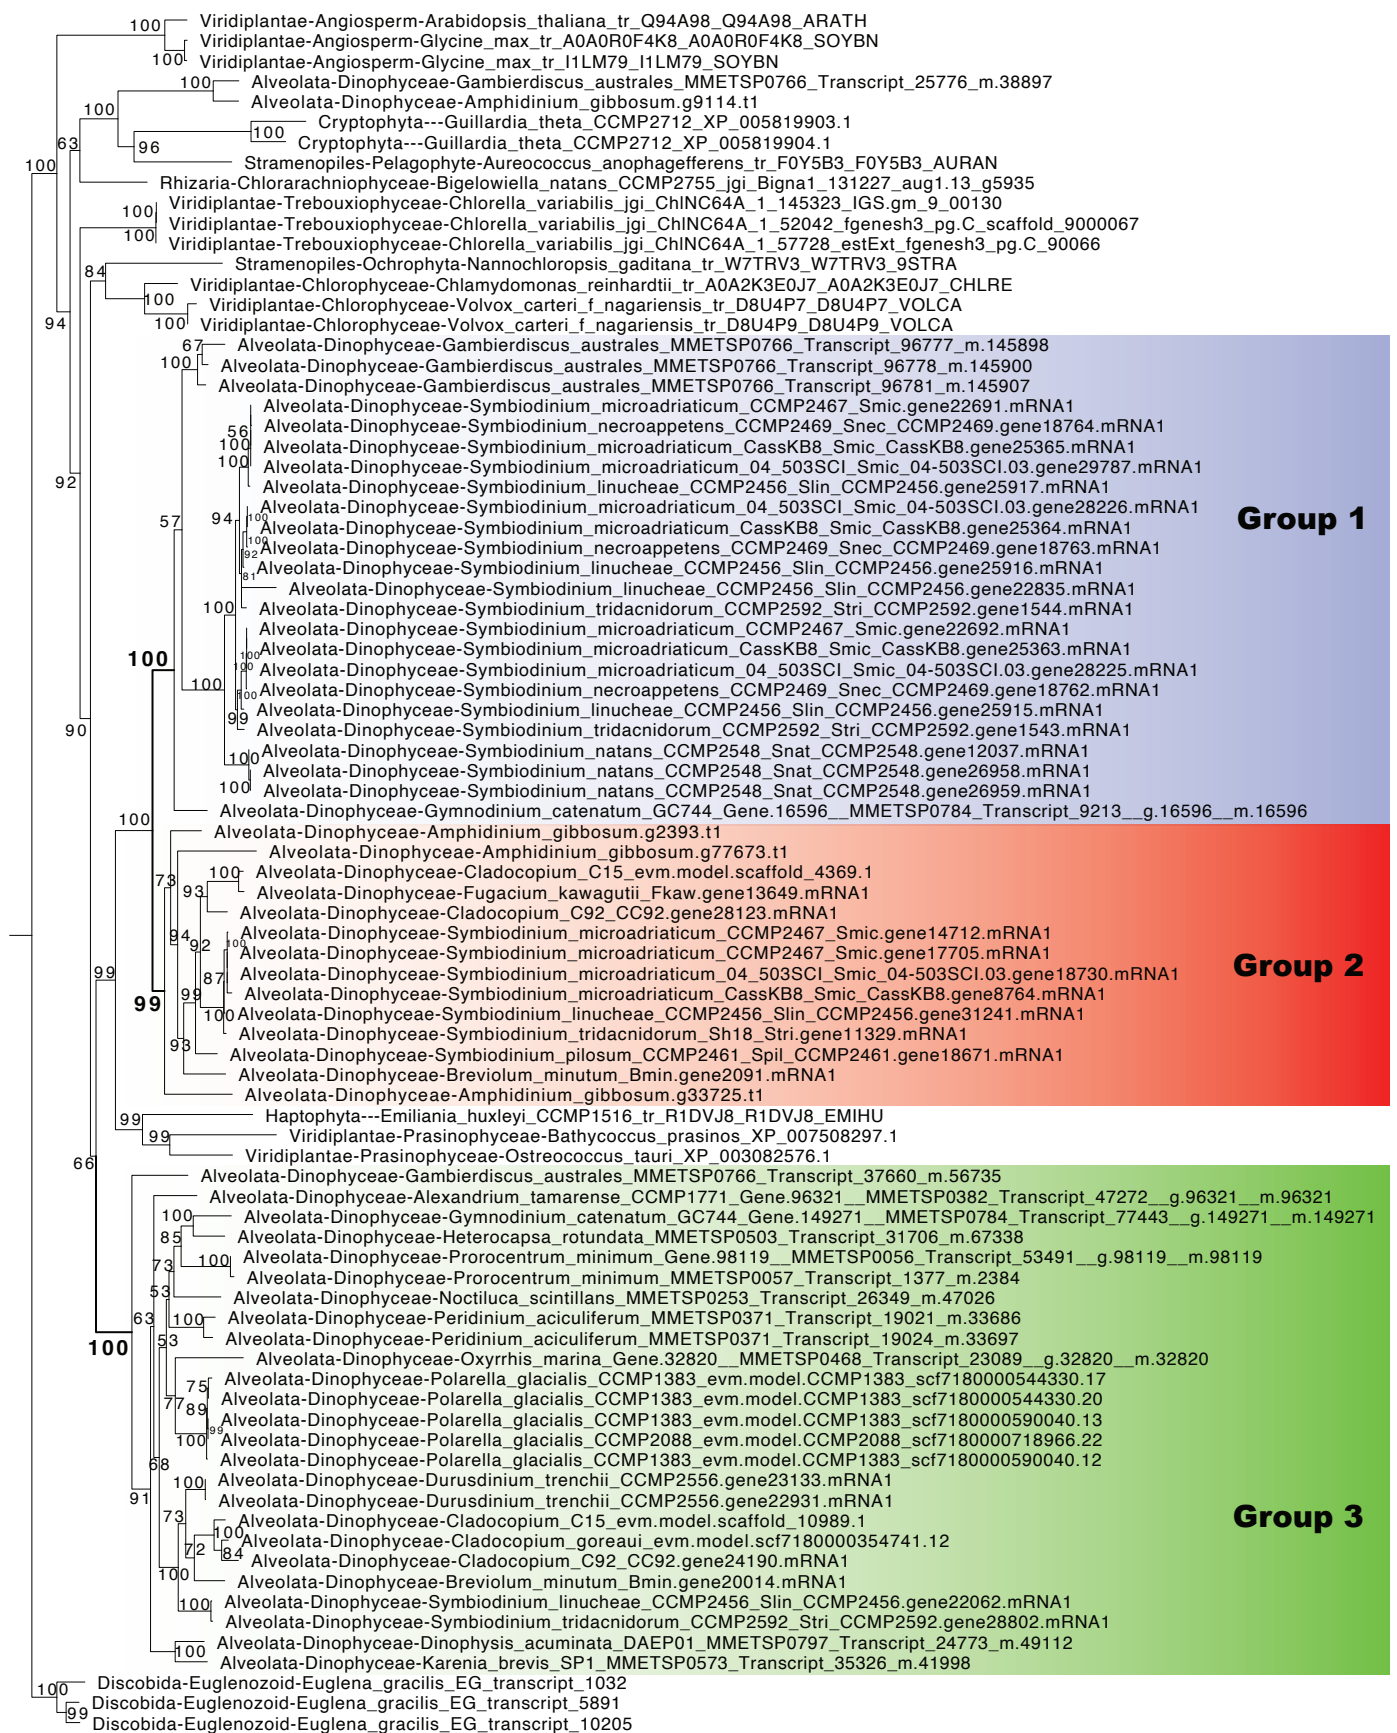

0.4

**Figure S4.** Maximum likelihood tree showing gene expansion of a green algal derived protein family that contain a remote homolog in *Arabidopsis thaliana* with function implicated in cytokinesis and meiosis.

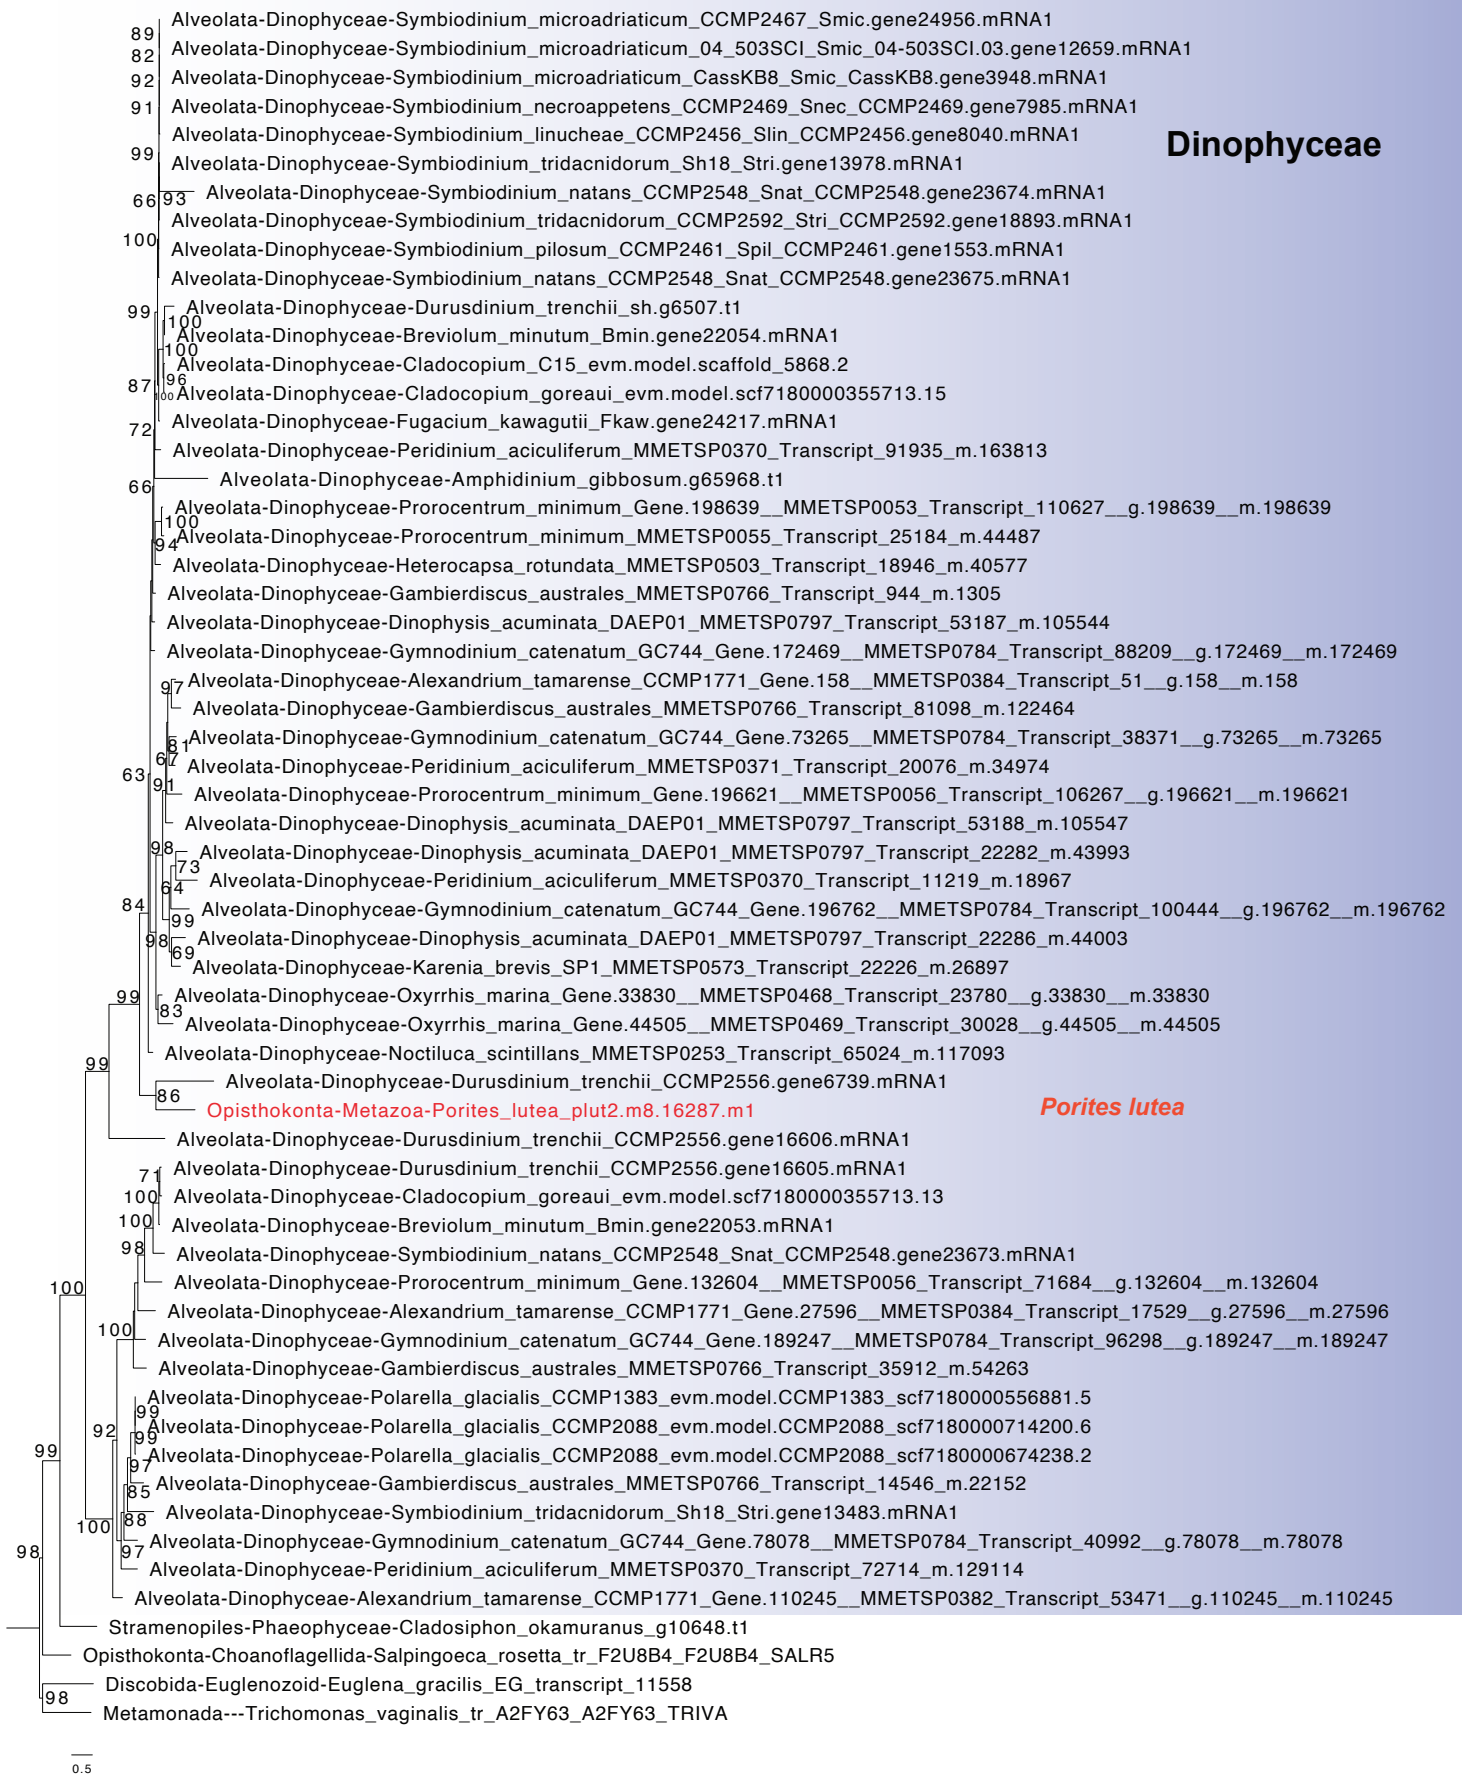

**Figure S5.** Maximum likelihood tree of phosphatidylinositol 4-phosphate 5-kinase showing possible misidentification of the sequence from the dinoflagellate symbiont associated with the coral.



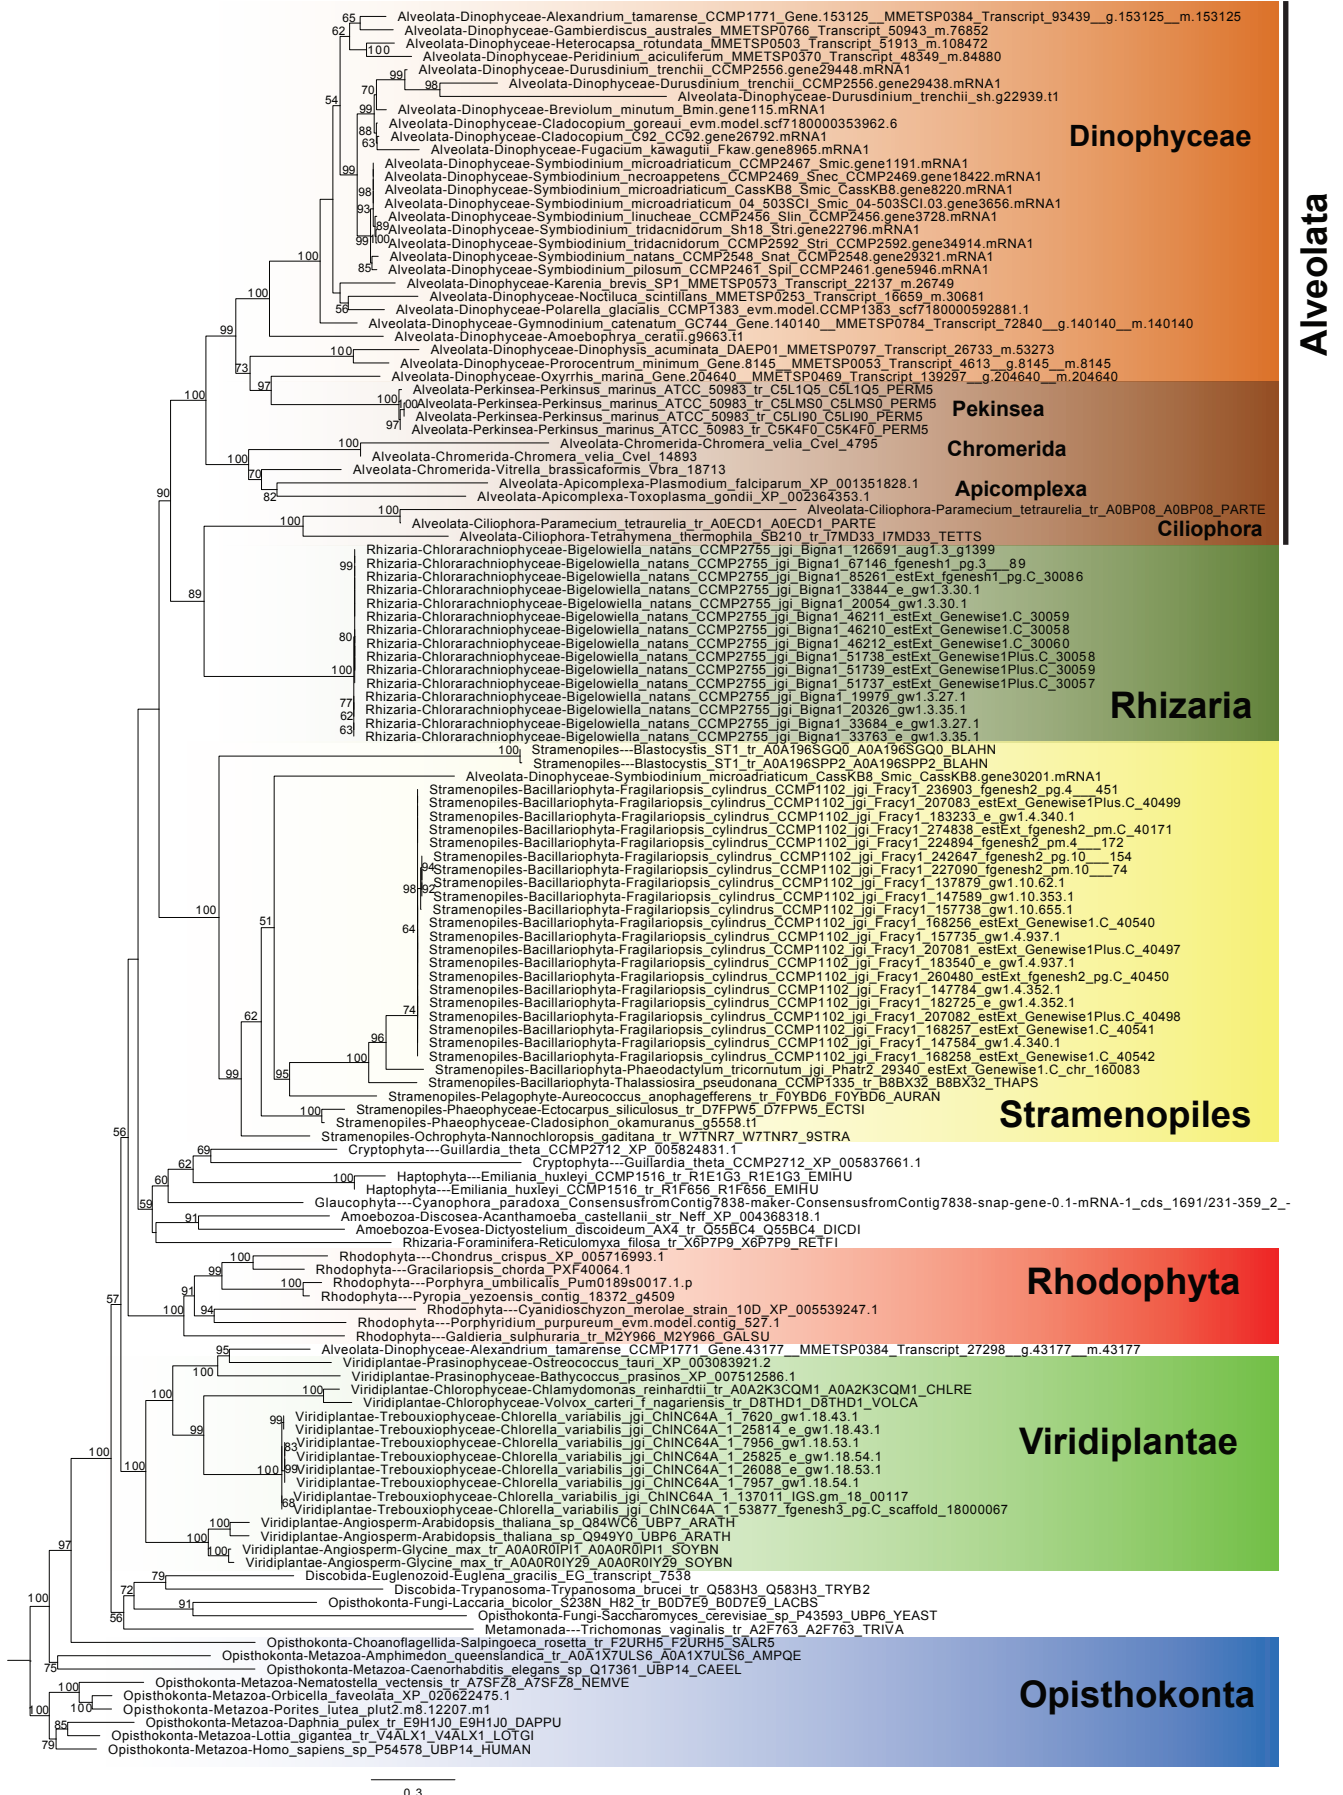

**Figure S6.** Maximum likelihood tree of ubiquitin carboxyl-terminal hydrolase showing strong evidence of vertical inheritance

Alveolata-Dinophyceae-Cladocopium\_goreau\_i\_evm.model.scf7180000355862.5  
(autophagy-related protein 18a)

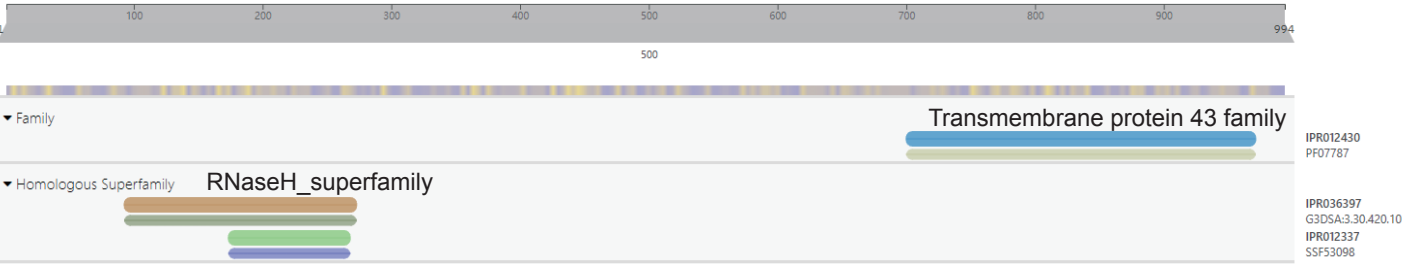

Alveolata-Dinophyceae-Cladocopium\_goreau\_i\_evm.model.scf7180000353294.2  
(transmembrane protein 43)

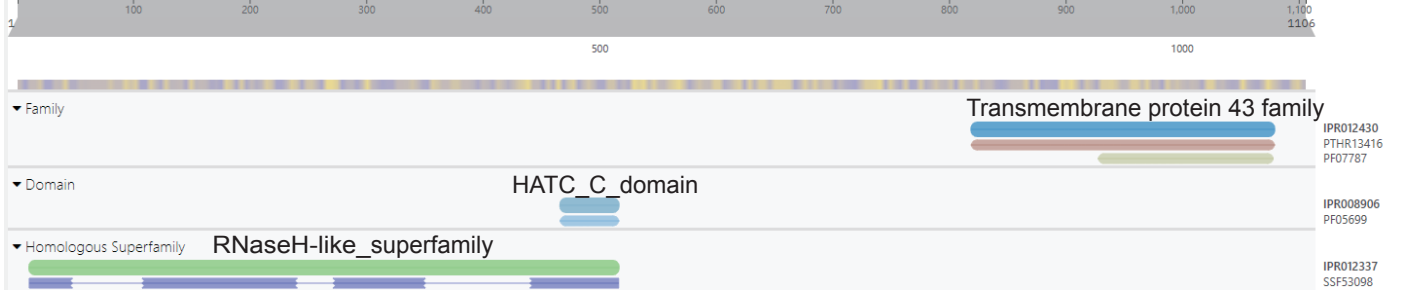

Alveolata-Dinophyceae-Symbiodinium\_microadriaticum\_CCMP2467\_Smic.gene13716.mRNA1  
(pentatricopeptide repeat-containing protein GUN1)

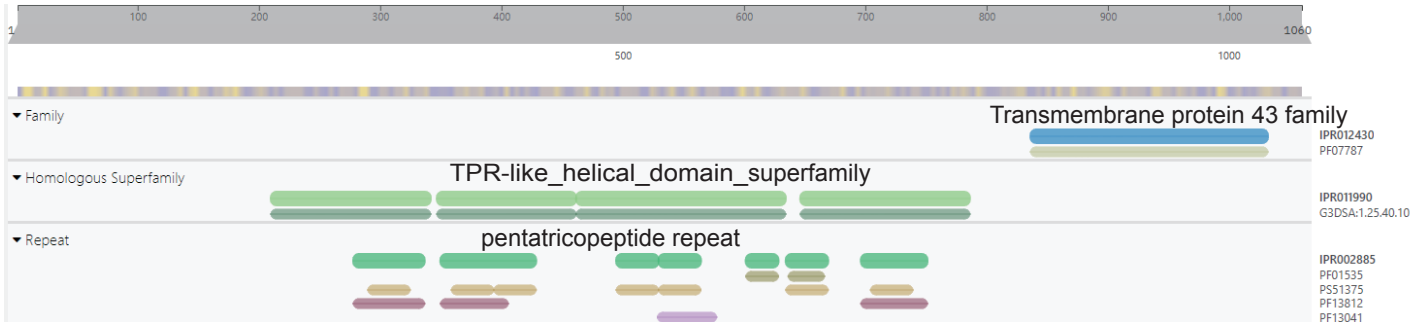

**Figure S7:** Domain configuration for a representative sequence from each of the three sub-clades in the tree of Figure 5, shown for the autophagy-related protein 18a, the transmembrane protein 43, and the pentatricopeptide repeat-containing protein GUN1.

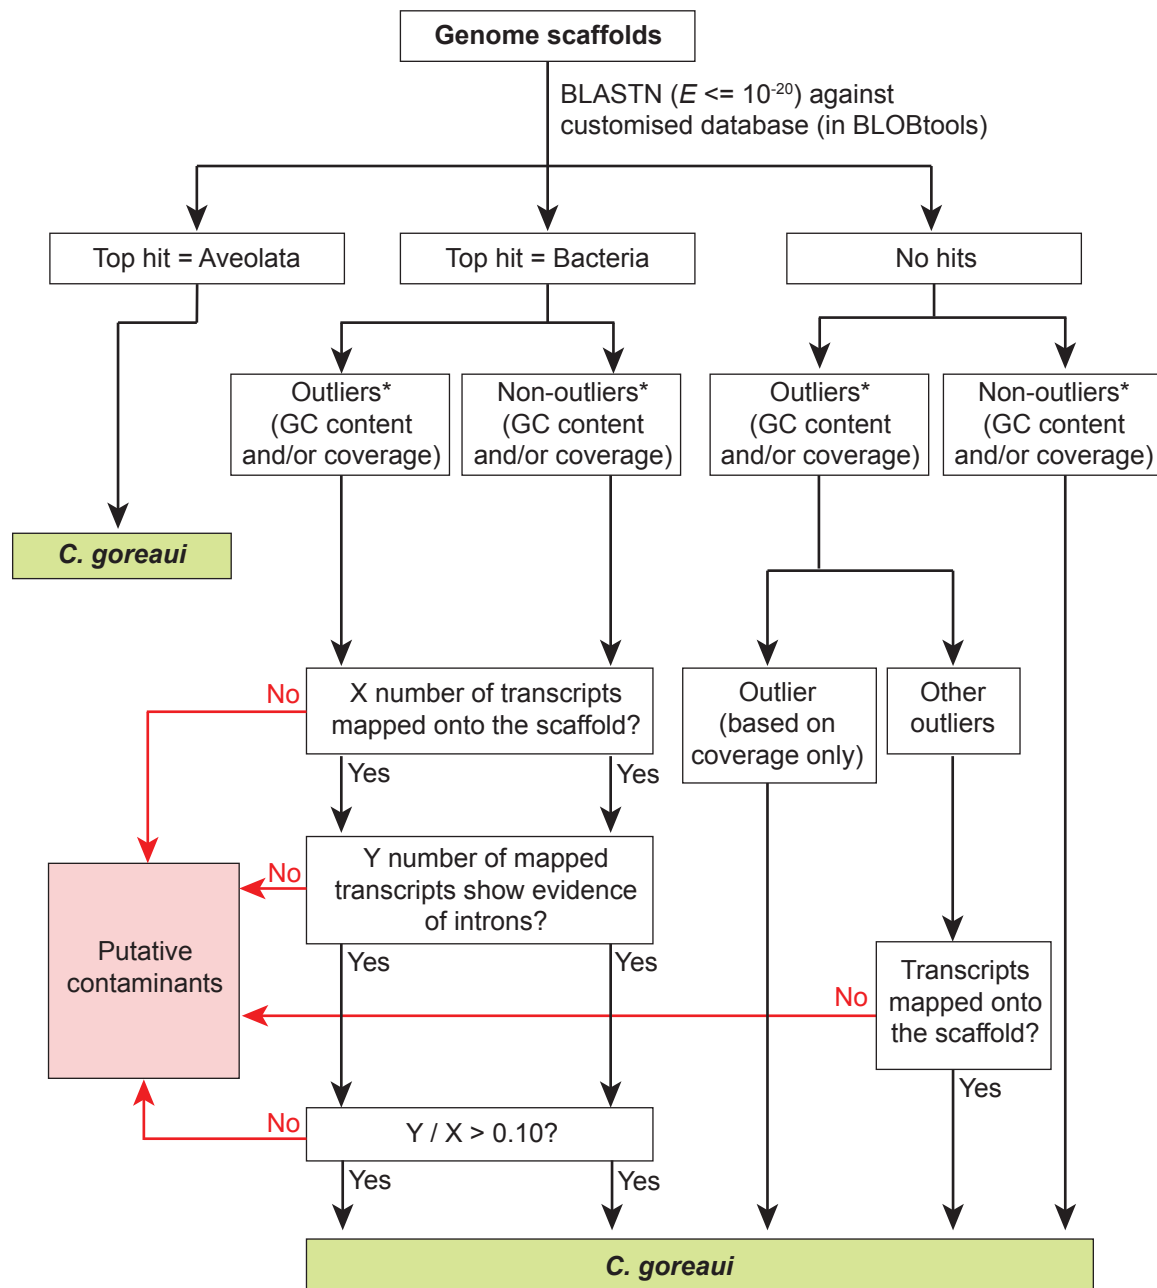

\*: outliers are determined using BLOBtools. Scaffolds for which G+C content and/or read coverage is external to the range of median  $\pm 1.5 \times$  interquartile range (IQR) are considered as outliers.

**Figure S8.** Decision tree for identification and removal of putative contaminant sequences.
